# Supplementary material for: Extracellular Vesicle-Packaged miR-195-5p Sensitizes Melanoma to Targeted Therapy with Kinase Inhibitors
Source: MDPI journal article supplement (doi:10.3390/cells12091317), 2023-05-05
Supplement: s1 [file s1]

Supplementary information

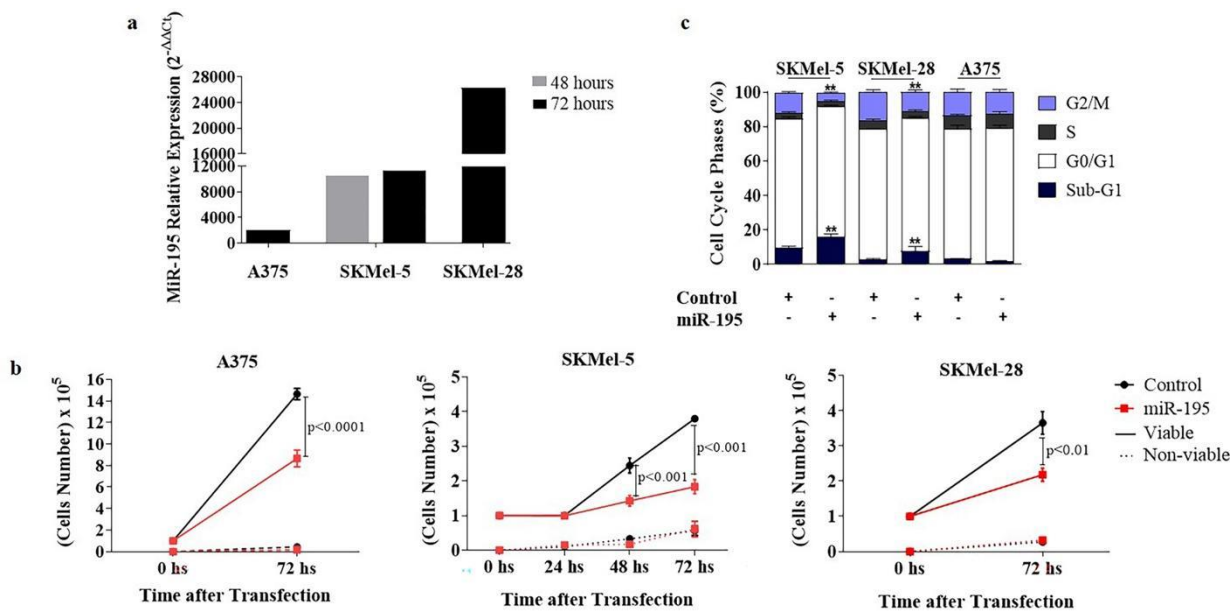

**Figure S1.** MiR-195-5p overexpression induces cytostatic and cytotoxic effect in human melanoma cells. **a.** miR-195-5p relative expression 48 and 72 h after transfection, compared to scramble cells. RNU48 was used as endogenous control. **b.** Cell number obtained by trypan blue count ( $n = 5$ ). **c.** Cell cycle profile of propidium iodide (PI)-labeled cells ( $n = 5$ ).

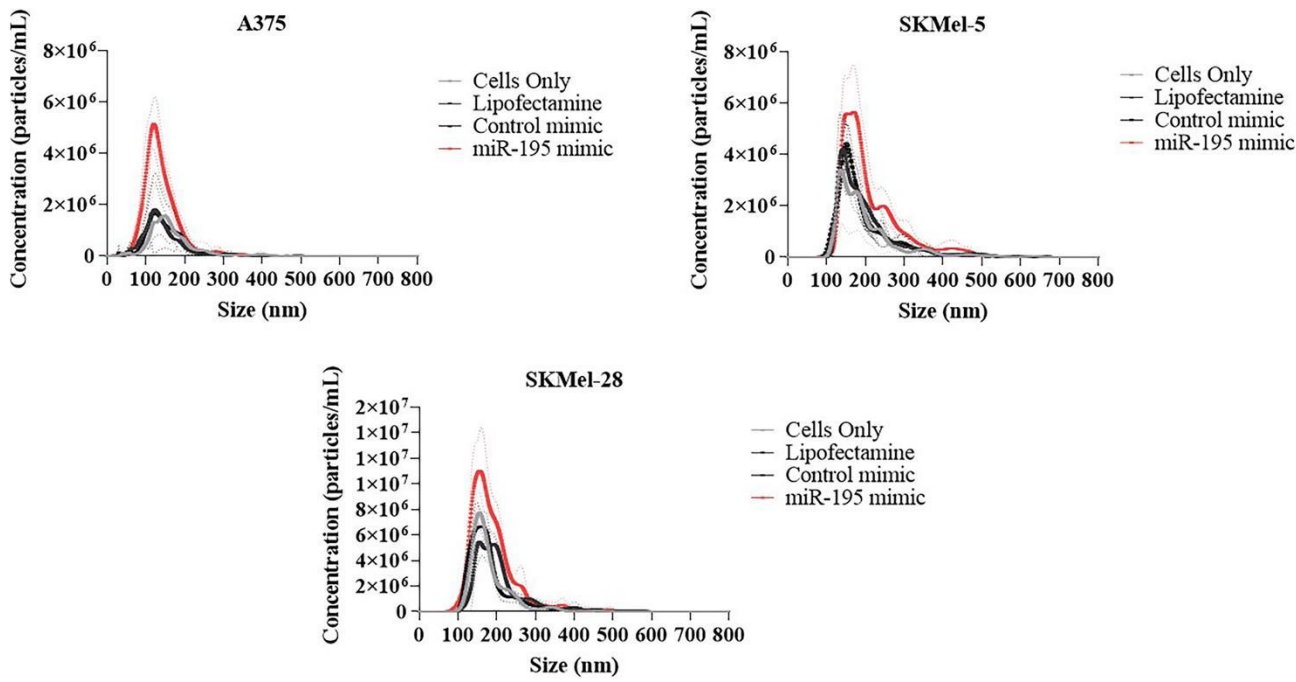

**Figure S2.** Vesiculation profile of control, lipofectamine and transfected cells confirming that induction of small EVs release is associated with miR-195-5p transfection.

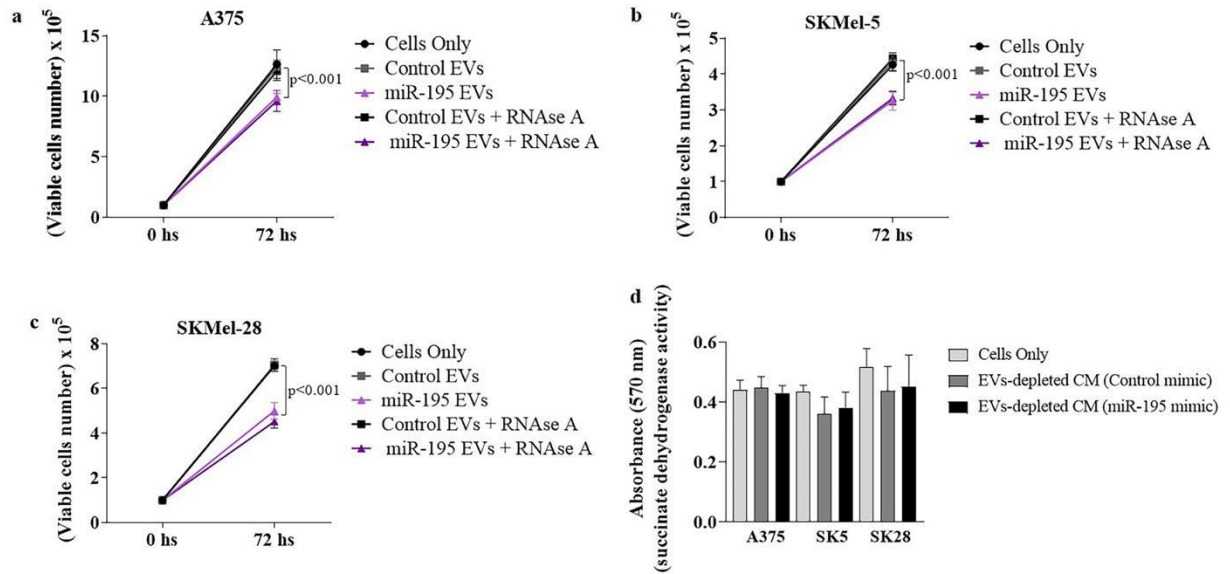

**Figure S3.** Cytostatic effect in *naïve* cells is exerted through EVs-mediated cargo transfer. **a-c.** Number of viable cells obtained by trypan blue count after EVs treatment with RNase A ( $n = 3$ ). **d:** Cell viability, measured by MTT assay, after incubation with EVs-depleted medium for 72 h ( $n = 8$ ).

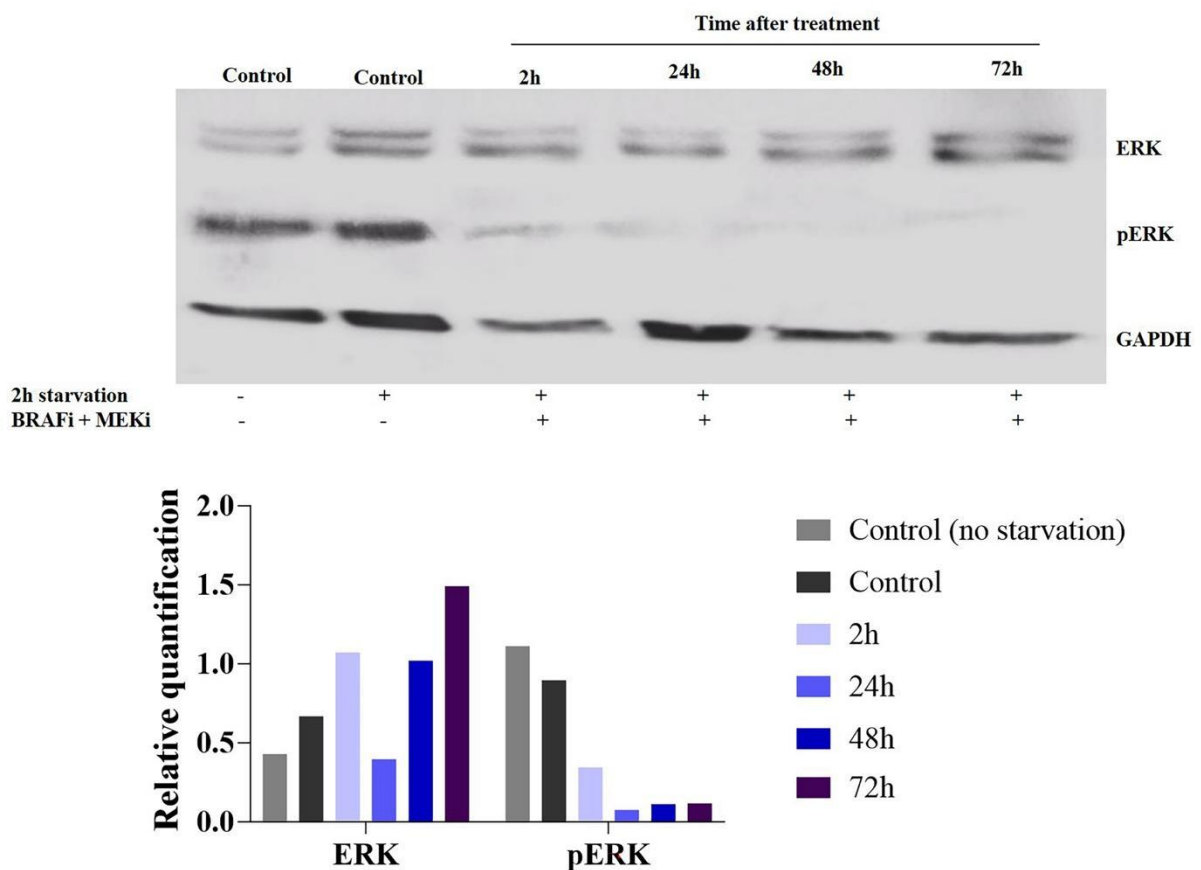

**Figure S4.** Inhibition of ERK phosphorylation after MAPKi treatment.

Western blot showing protein levels of total ERK and phospho-ERK after MAPKi treatment. Cells were previously starved for 2 h (cultured without FBS).

**Table S1.** Primers sequences used for RT-qPCR.

| Gene                             | Forward                          | Reverse                             |
|----------------------------------|----------------------------------|-------------------------------------|
| <b><math>\beta</math>-ACTINA</b> | 5'-AGAAAATCTGGCACCACA-3'         | 5'-AGAGGCGTACAGGGATAGCA-3'          |
| <b>BCL2-L1</b>                   | 5'-ACAGCAGCAGTTTGGATGC-3'        | 5'-GGTGATGTGGAGCCTGGGATG-3'         |
| <b>CDC42</b>                     | 5' - GCCCGTGACCTGAAGGCTGTCA - 3' | 5' - TGCTTTTAGTATGATGCCGACACCA - 3' |
| <b>GAPDH</b>                     | 5'-TGCACACCAACTGCTTAGC-3'        | 5'-GGTGGACTGTGGTCATGAG-3'           |
| <b>HPRT</b>                      | 5'-CCCTGGCGTCGTGATTAGT-3'        | 5'-TCTCGAGCAAGAGGTTCACT-3'          |
| <b>RAB27A</b>                    | 5' - AGAGGAGGAAGCCATAGCAC - 3'   | 5' - CATGACCATTGATCGCACCAC - 3'     |
| <b>RAB27B</b>                    | 5' - GGAAGTGGCTGACAAATATGG - 3'  | 5' - CAGTATCAGGGATTTGTGTCTT - 3'    |
| <b>RAB31</b>                     | 5' - ATCTTTGGGCTGGGTTTG - 3'     | 5' - ATGGGCTCATTAGTGGGTTAG - 3'     |

**Table S2.** List of genes analyzed by microfluidic RT-qPCR.

| <b>ABCB1</b> | <b>COL6A2</b> | <b>MMP12</b> | <b>TGFB1</b> |
|--------------|---------------|--------------|--------------|
| ABCC1        | CXCR4         | MMP9         | TRAF6        |
| ACTB         | E2F1          | MYC          | TWIST1       |
| ACVR1B       | EGFR          | NANOG        | TWIST2       |
| AKT1         | EGR1          | NFE2L2       | VEGFA        |
| ALDH1A1      | EIF2AK3       | NFE2L3       | VIM          |
| ATF4         | EPHA2         | NODAL        | WNT3A        |
| ATF6         | ERN1          | NOTCH1       | WNT5A        |
| ATM          | FGF13         | NOTCH4       | YAP1         |
| AXIN2        | FGF2          | PDCD1        | YWHAZ        |
| B2M          | FGF2R         | PHB          | ZEB1         |
| BAD          | FLOT2         | POU5F1       | ZEB2         |
| BAX          | FOS           | PTEN         |              |
| BBC3         | GAPDH         | RB1          |              |
| BCL2         | GUSB          | RHOA         |              |
| BCL2L1       | HIF1A         | RIPK2        |              |
| BIRC5        | HMGB1         | RIPK3        |              |
| CASP8        | HPRT1         | RPLP0        |              |
| CCND1        | IGF1R         | SNAI1        |              |
| CD274        | JUN           | SOX2         |              |
| CD44         | KRAS          | SOX7         |              |
| CDH1         | LAMC2         | STAT1        |              |
| CDH2         | LATS1         | STAT3        |              |
| CDH5         | LATS2         | STK3         |              |
| CDKN1A       | MCL1          | STK4         |              |
| CDKN2A       | MDM2          | TAZ          |              |
| CDKN3        | MITF          | TBK1         |              |
| CFLAR        | MMP1          | TFRC         |              |

**Table S3.** Antibodies used for WB.

| Antibody                   | Dilution (titer) | Brand                                 |
|----------------------------|------------------|---------------------------------------|
| Anti-Calnexin              | 1:500            | Abcam – ab58504                       |
| Anti-CD63                  | 1:700            | Thermo Fischer Scientific - PA592370  |
| Anti-CD9                   | 1:500            | Thermo Fischer Scientific - PA5-85955 |
| Anti-BCL2-L1               | 1:1000           | Thermo Fischer Scientific - MA5-15142 |
| Anti-gERK1/2               | 1:10000          | Sigma – M5670                         |
| Anti-pERK1/2               | 1:2000           | Sigma – M8159                         |
| Anti-ACTIN                 | 1:2000           | Sigma – A5060                         |
| Anti-GAPDH                 | 1:1000           | Sigma – G8795                         |
| Anti-rabbit IgG Peroxidase | 1:7000           | Sigma – A9169                         |
| Anti-mouse IgM Peroxidase  | 1:4000           | Sigma – M-6274                        |

**Table S4.** Predicted targets and binding sites.

| Gene                                     | Predicted pairing                                                                     |
|------------------------------------------|---------------------------------------------------------------------------------------|
| <i>BCL2-L1</i> (946-952)<br>miR-202-3p   | 5'...CCCCAGGGUCUUCCCC <b>UACCUCA</b> G...3'<br>3' AAGGGUACGGGAU <b>AUGGAGA</b> 5'     |
| <i>BCL2-L1</i> (2529-2536)<br>miR-195-5p | 5'...GAAUAUCCAAUCCUG <b>UGCUGCUA</b> ...3'<br>3' CGGUUAUAAAGAC <b>ACGACGAU</b> 5'     |
| <i>YAP1</i> (162-168)<br>miR-195-5p      | 5'...CUCUUCCUUGUCCA <b>UUGCUGCU</b> G...3'<br>3' CGGUUAUAAAGAC <b>ACGACGAU</b> 5'     |
| <i>VEGFA</i> (292-299)<br>miR-195-5p     | 5'...CCAUUUUUUUUUCU <b>UGCUGCUA</b> ...3'<br>3' CGGUUAUAAAGAC <b>ACGACGAU</b> 5'      |
| <i>CCND1</i> (1961-1967)<br>miR-195-5p   | 5'...CCAUUUUUCUUAUUGC--- <b>GCUGCU</b> AC...3'<br>3' CGGUUAUAAAGACA <b>CGACGAU</b> 5' |
| <i>CCND1</i> (2033-2040)<br>miR-195-5p   | 5'...CUCUUUCACAUUGUU- <b>UGCUGCUA</b> ...3'<br>3' CGGUUAUAAAGAC <b>ACGACGAU</b> 5'    |
| <i>CCND1</i> (2213-2220)<br>miR-202-3p   | 5'...GGUUGCUGUUUCACA <b>AUACCUCA</b> ...3'<br>3' AAGGGUACGGGAU <b>AUGGAGA</b> 5'      |
| <i>CCND1</i> (2873-2879)<br>miR-202-3p   | 5'...AACACGGCUCACGCU <b>UACCUCA</b> A...3'<br>3' AAGGGUACGGGAU <b>AUGGAGA</b> 5'      |
| <i>CCND1</i> (2730-2750)<br>miR-152-3p   | 5'...CCGCACGATTTCA <b>TTGAACA</b> ...3'<br>3' UCAGUGCAUGACAG <b>AACUUGG</b> 5'        |
